# Supplementary material for: Low CO2 induces urea cycle intermediate accumulation in Arabidopsis thaliana
Source: PubMed Central journal article supplement (PMC6334940; doi:10.1371/journal.pone.0210342), 2019-01-16
Supplement: pone.0210342.s002.pdf [file pone.0210342.s002.pdf]

Fig A – Blume et al.

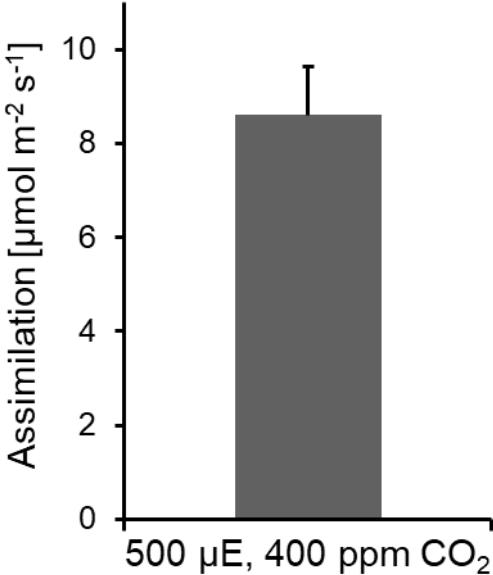

**Fig A. CO<sub>2</sub> assimilation of 5-week-old *Arabidopsis* plants.** Net CO<sub>2</sub> assimilation was recorded under ambient CO<sub>2</sub> conditions (400 ppm) and light saturating conditions (500  $\mu\text{E}$ ).

Fig B – Blume et al.

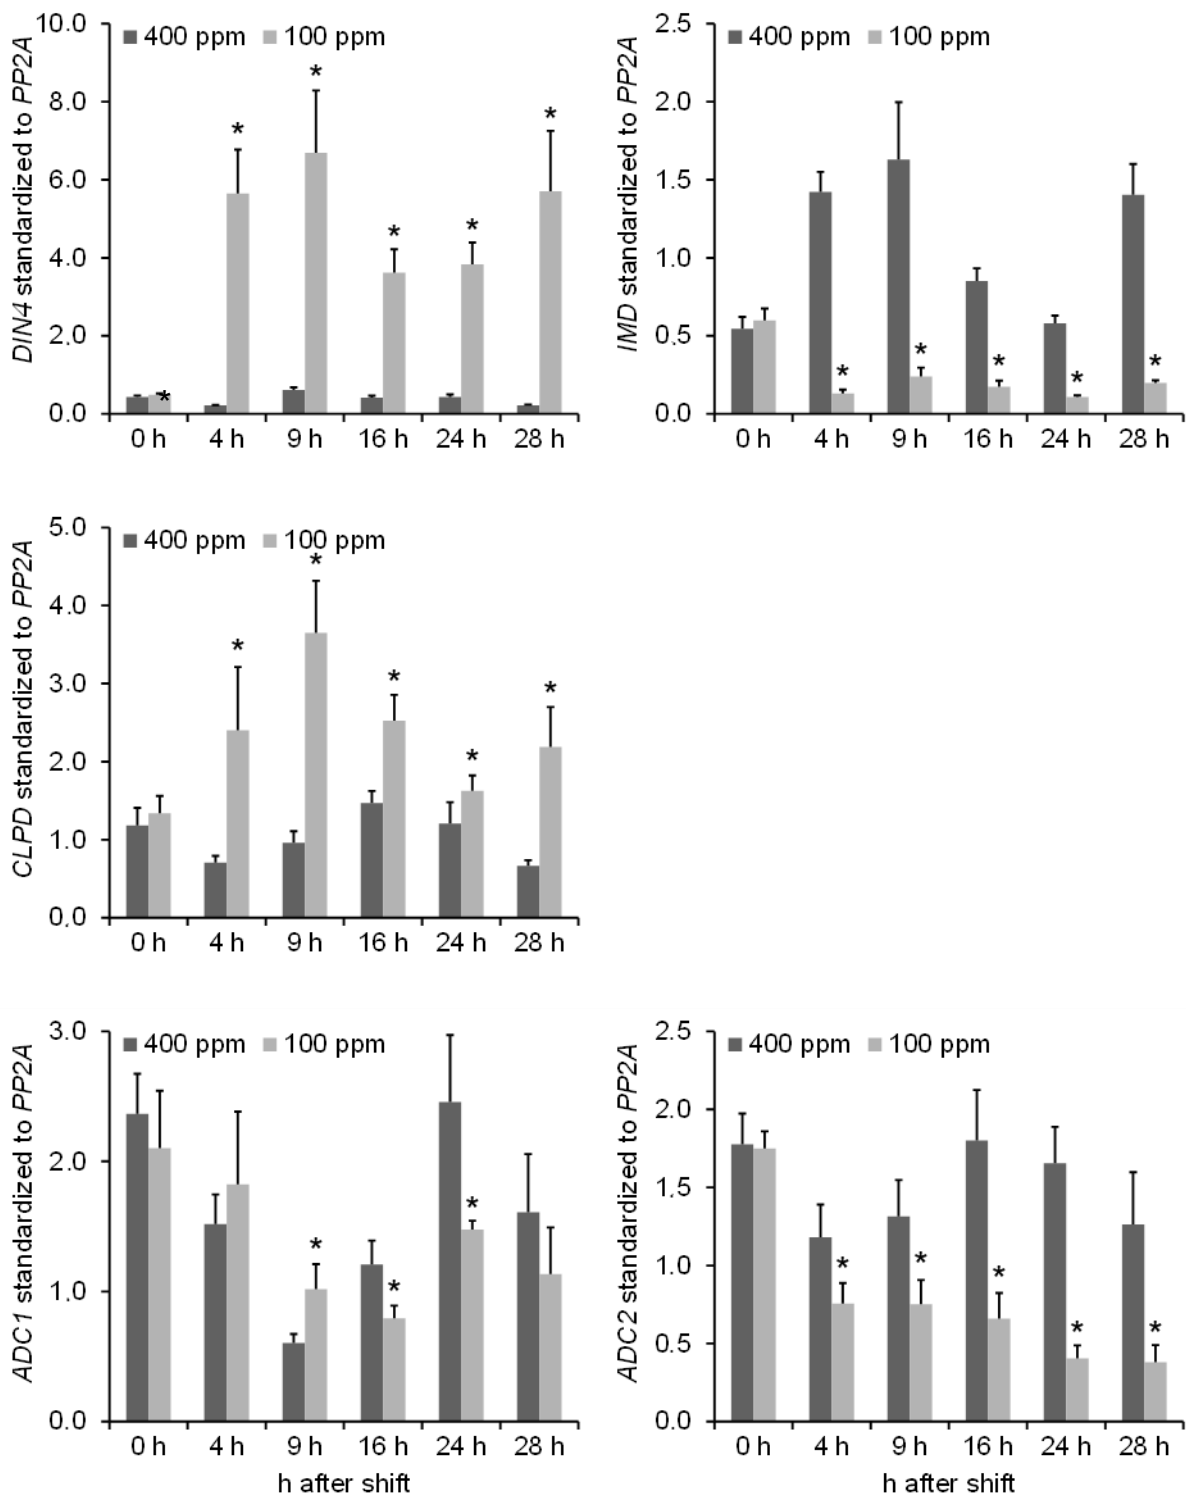

**Fig B. Transcript levels of selected genes of leucine synthesis (*IMD*) and degradation (*DIN4*), protein degradation (*CLPD*), and polyamine synthesis (*ADC1*, *2*) at 400 ppm and 100 ppm CO<sub>2</sub> standardized to *PP2A*.** Data are the mean of five biological replicates  $\pm$  SD. Significance was tested according to the two-tailed Student's t-test; values were changed to log<sub>2</sub> ratios to allow this test (\*  $p < 0.05$ ) *DIN4*, Dark-induced 4; *IMD*, Isopropylmalate dehydrogenase; *CLPD*, caseinolytic protease D; *ADC*, arginine decarboxylase.

Fig C – Blume et al.

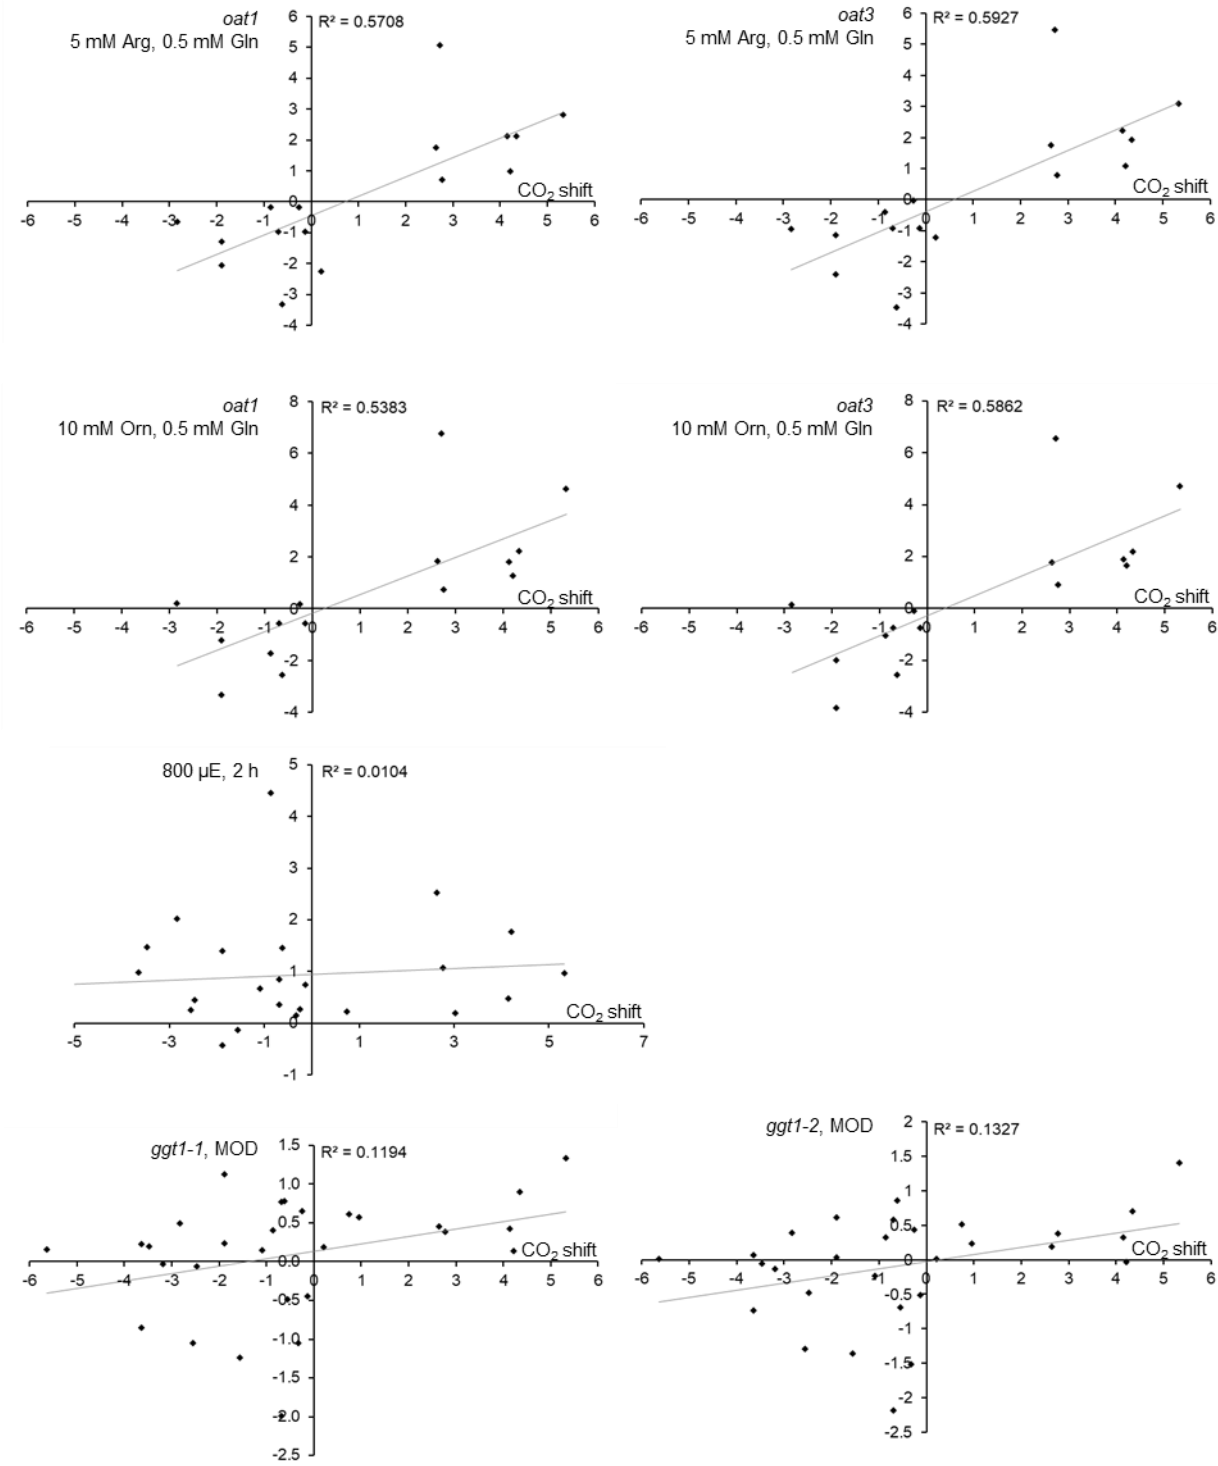

**Fig C. Correlation of log<sub>2</sub> metabolite changes between the low CO<sub>2</sub> shift and in response to different stresses/different *Arabidopsis* mutants. The fold changes are given in Fig 6.**

Fig D – Blume et al.

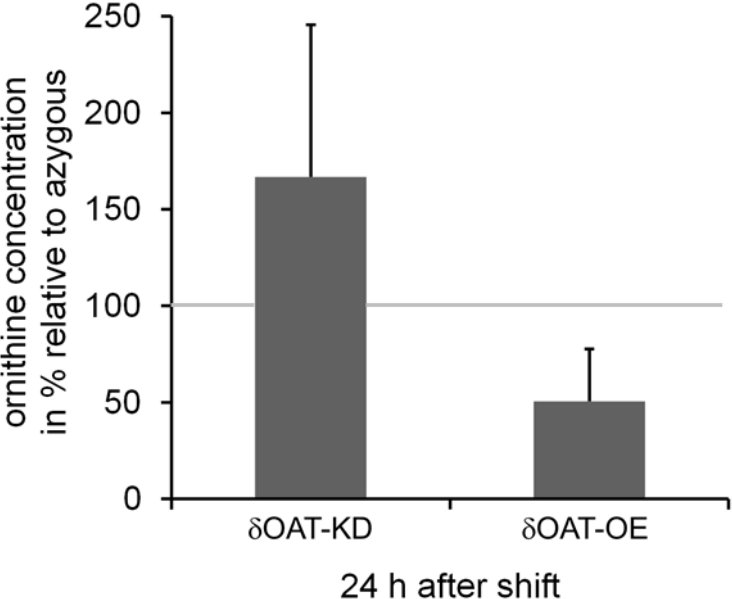

**Fig D. Concentration of ornithine in knockdown (KD) and overexpression (OE) lines of  $\delta OAT$  after a shift from 400 ppm to 100 ppm CO<sub>2</sub> relative to azygous plants.** Plant material was harvested 24 h after shifting the plants to low CO<sub>2</sub> concentrations. Data are the mean of three (KD) or two (OE) biological replicates  $\pm$  SD. Grey line: wild type  $\delta OAT$  level.
